# Supplementary material for: Vanadium Oxide-Poly(3,4-ethylenedioxythiophene) Nanocomposite as High-Performance Cathode for Aqueous Zn-Ion Batteries: The Structural and Electrochemical Characterization
Source: MDPI journal article supplement (doi:10.3390/nano12213896), 2022-11-04
Supplement: s1 [file s1]

Supplementary Materials

# Vanadium Oxide-Poly(3,4-ethylenedioxythiophene) Nanocomposite as High-Performance Cathode for Aqueous Zn-Ion Batteries: The Structural and Electrochemical Characterization

Filipp S. Volkov <sup>1</sup>, Svetlana N. Eliseeva <sup>1</sup>, Mikhail A. Kamenskii <sup>1</sup>, Alexey I. Volkov <sup>1</sup>, Elena G. Tolstopjatova <sup>1</sup>, Oleg V. Glumov <sup>1</sup>, Lijun Fu <sup>2</sup> and Veniamin V. Kondratiev <sup>1,\*</sup>

<sup>1</sup> Institute of Chemistry, Saint Petersburg State University, 7/9 Universitetskaya Nab, 199034 Saint Petersburg, Russia

<sup>2</sup> State Key Laboratory of Materials-Oriented Chemical Engineering, Nanjing Tech University, Nanjing 211816, China

\* Correspondence: v.kondratiev@spbu.ru

**Citation:** Volkov, F.S.; Eliseeva, S.N.; Kamenskii, M.A.; Volkov, A.I.; Tolstopjatova, E.G.; Glumov, O.V.; Fu, L.; Kondratiev, V.V. Vanadium Oxide-Poly(3,4-ethylenedioxythiophene) Nanocomposite as High-Performance Cathode for Aqueous Zn-Ion Batteries: The Structural and Electrochemical Characterization. *Nanomaterials* **2022**, *12*, 3896. <https://doi.org/10.3390/nano12213896>

Academic Editor: Wenbin Hu

Received: 27 September 2022

Accepted: 2 November 2022

Published: 4 November 2022

**Publisher's Note:** MDPI stays neutral with regard to jurisdictional claims in published maps and institutional affiliations.

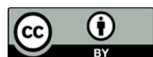

**Copyright:** © 2022 by the authors. Licensee MDPI, Basel, Switzerland. This article is an open access article distributed under the terms and conditions of the Creative Commons Attribution (CC BY) license (<https://creativecommons.org/licenses/by/4.0/>).

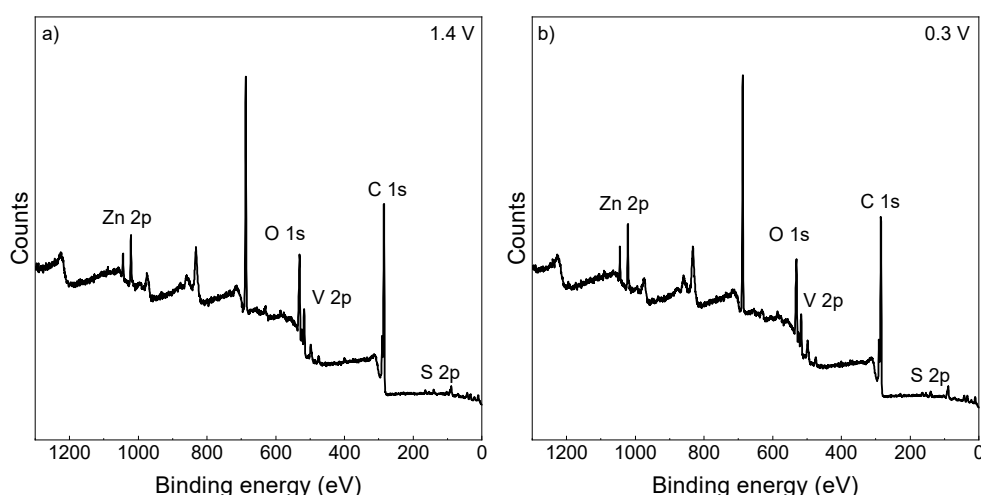

**Figure S1.** Ex situ XPS survey spectra of VO@PEDOT electrode materials: (a) in the charged state; (b) in the discharged state.

**Table S1.** The comparison of the VO@PEDOT cathode with other V<sub>2</sub>O<sub>5</sub>-based cathodes for Zn-ion batteries.

| Material                                                        | Electrolyte                                           | Specific capacity,<br>mA·h·g <sup>-1</sup> (current<br>density) | Ref.      |
|-----------------------------------------------------------------|-------------------------------------------------------|-----------------------------------------------------------------|-----------|
| VO@PEDOT nanosheets                                             | 3 M ZnSO <sub>4</sub>                                 | 390 (0.3 A·g <sup>-1</sup> )                                    | This work |
|                                                                 |                                                       | 357 (1 A·g <sup>-1</sup> )                                      |           |
|                                                                 |                                                       | 274 (5 A·g <sup>-1</sup> )                                      |           |
|                                                                 |                                                       | 192 (10 A·g <sup>-1</sup> )                                     |           |
| Al-V <sub>10</sub> O <sub>24</sub> nanobelts                    | 3 M Zn(CF <sub>3</sub> SO <sub>3</sub> ) <sub>2</sub> | 370 (0.5 A·g <sup>-1</sup> )                                    | [1]       |
|                                                                 |                                                       | 327 (1 A·g <sup>-1</sup> )                                      |           |
|                                                                 |                                                       | 232 (5 A·g <sup>-1</sup> )                                      |           |
|                                                                 |                                                       | 290.5 (0.5 A·g <sup>-1</sup> )                                  |           |
| V <sub>10</sub> O <sub>24</sub> /C nanosheets                   | 3 M Zn(CF <sub>3</sub> SO <sub>3</sub> ) <sub>2</sub> | 241 (1 A·g <sup>-1</sup> )                                      | [2]       |
|                                                                 |                                                       | 148.6 (5 A·g <sup>-1</sup> )                                    |           |
|                                                                 |                                                       | 116.7 (10 A·g <sup>-1</sup> )                                   |           |
|                                                                 |                                                       | 134 (0.5 A·g <sup>-1</sup> )                                    |           |
| V <sub>10</sub> O <sub>24</sub> ·12H <sub>2</sub> O nanobelts   | 3 M Zn(CF <sub>3</sub> SO <sub>3</sub> ) <sub>2</sub> | 119 (1 A·g <sup>-1</sup> )                                      | [3]       |
|                                                                 |                                                       | 90 (5 A·g <sup>-1</sup> )                                       |           |
|                                                                 |                                                       | 80 (10 A·g <sup>-1</sup> )                                      |           |
|                                                                 |                                                       | 243 (0.5 A·g <sup>-1</sup> )                                    |           |
| V <sub>10</sub> O <sub>24</sub> ·12H <sub>2</sub> O layered     | 2 M ZnSO <sub>4</sub>                                 | 200 (1 A·g <sup>-1</sup> )                                      | [4]       |
|                                                                 |                                                       | 152 (2 A·g <sup>-1</sup> )                                      |           |
|                                                                 |                                                       | 312 (0.5 A·g <sup>-1</sup> )                                    |           |
|                                                                 |                                                       | 283 (1 A·g <sup>-1</sup> )                                      |           |
| V <sub>2</sub> O <sub>5</sub> /PANI nanocomposite               | 3 M Zn(CF <sub>3</sub> SO <sub>3</sub> ) <sub>2</sub> | 201 (6 A·g <sup>-1</sup> )                                      | [5]       |
|                                                                 |                                                       | 278 (0.5 A·g <sup>-1</sup> )                                    |           |
|                                                                 |                                                       | 264 (1 A·g <sup>-1</sup> )                                      |           |
|                                                                 |                                                       | 202 (5 A·g <sup>-1</sup> )                                      |           |
| V <sub>2</sub> O <sub>5</sub> /PANI crisscrossed leaf-like      | 3 M Zn(CF <sub>3</sub> SO <sub>3</sub> ) <sub>2</sub> | 156 (10 A·g <sup>-1</sup> )                                     | [6]       |
|                                                                 |                                                       | 333 (0.5 A·g <sup>-1</sup> )                                    |           |
|                                                                 |                                                       | 307 (1 A·g <sup>-1</sup> )                                      |           |
|                                                                 |                                                       | 121 (5 A·g <sup>-1</sup> )                                      |           |
| V <sub>2</sub> O <sub>5</sub> /THF nanobelts                    | 3 M Zn(CF <sub>3</sub> SO <sub>3</sub> ) <sub>2</sub> | 360 (0.5 A·g <sup>-1</sup> )                                    | [6]       |
|                                                                 |                                                       | 342 (1 A·g <sup>-1</sup> )                                      |           |
|                                                                 |                                                       | 272 (5 A·g <sup>-1</sup> )                                      |           |
|                                                                 |                                                       | 216 (10 A·g <sup>-1</sup> )                                     |           |
| PANI-V <sub>2</sub> O <sub>5</sub><br>nanosheets (100 °C)       | 3 M Zn(CF <sub>3</sub> SO <sub>3</sub> ) <sub>2</sub> | 297 (0.5 A·g <sup>-1</sup> )                                    | [7]       |
|                                                                 |                                                       | 276 (1 A·g <sup>-1</sup> )                                      |           |
|                                                                 |                                                       | 199 (5 A·g <sup>-1</sup> )                                      |           |
|                                                                 |                                                       | 133 (10 A·g <sup>-1</sup> )                                     |           |
| PANI-V <sub>2</sub> O <sub>5</sub><br>nanosheets (120 °C)       | 3 M Zn(CF <sub>3</sub> SO <sub>3</sub> ) <sub>2</sub> | 295 (0.5 A·g <sup>-1</sup> )                                    | [7]       |
|                                                                 |                                                       | 250 (1 A·g <sup>-1</sup> )                                      |           |
|                                                                 |                                                       | 190 (5 A·g <sup>-1</sup> )                                      |           |
|                                                                 |                                                       | ~340 (0.5 A·g <sup>-1</sup> )                                   |           |
| (PANI) <sub>x</sub> V <sub>2</sub> O <sub>5</sub><br>nanosheets | 3 M Zn(CF <sub>3</sub> SO <sub>3</sub> ) <sub>2</sub> | 250 (1 A·g <sup>-1</sup> )                                      | [8]       |
|                                                                 |                                                       | 190 (5 A·g <sup>-1</sup> )                                      |           |
|                                                                 |                                                       | ~340 (0.5 A·g <sup>-1</sup> )                                   |           |
|                                                                 |                                                       | ~340 (0.5 A·g <sup>-1</sup> )                                   |           |
| PANI/V <sub>2</sub> O <sub>5</sub>                              | 2 M Zn(CF <sub>3</sub> SO <sub>3</sub> ) <sub>2</sub> | ~340 (0.5 A·g <sup>-1</sup> )                                   | [9]       |

|                                                                        |                                                         |                                                                                                                                 |      |
|------------------------------------------------------------------------|---------------------------------------------------------|---------------------------------------------------------------------------------------------------------------------------------|------|
| aggregated flakes                                                      |                                                         | ~330 (1 A·g <sup>-1</sup> )<br>~290 (5 A·g <sup>-1</sup> )<br>235 (20 A·g <sup>-1</sup> )<br>380 (0.5 A·g <sup>-1</sup> )       |      |
| PANI/V <sub>2</sub> O <sub>5</sub><br>sponge-like particles            | 2 M Zn(CF <sub>3</sub> SO <sub>3</sub> ) <sub>2</sub>   | 340 (1 A·g <sup>-1</sup> )<br>247 (2 A·g <sup>-1</sup> )<br>327 (0.5 A·g <sup>-1</sup> )                                        | [10] |
| PPy/VOH<br>nanosheets                                                  | 3 M Zn(CF <sub>3</sub> SO <sub>3</sub> ) <sub>2</sub>   | 303 (1 A·g <sup>-1</sup> )<br>281 (2 A·g <sup>-1</sup> )<br>186.4 (0.5 A·g <sup>-1</sup> )                                      | [11] |
| V <sub>2</sub> O <sub>5</sub> @PPy                                     | 2 M ZnSO <sub>4</sub>                                   | 101.8 (1 A·g <sup>-1</sup> )<br>65.3 (5 A·g <sup>-1</sup> )<br>360 (1 A·g <sup>-1</sup> )                                       | [12] |
| V <sub>2</sub> O <sub>5</sub> @PEDOT<br>monolithic grains              | 3 M Zn(CF <sub>3</sub> SO <sub>3</sub> ) <sub>2</sub>   | 280 (5 A·g <sup>-1</sup> )<br>197 (10 A·g <sup>-1</sup> )<br>~325 (0.5 A·g <sup>-1</sup> )                                      | [13] |
| PEDOT-VO<br>3D flowers                                                 | 3 M Zn(CF <sub>3</sub> SO <sub>3</sub> ) <sub>2</sub>   | ~290 (5 A·g <sup>-1</sup> )<br>~275 (10 A·g <sup>-1</sup> )<br>282.2 (0.5 A·g <sup>-1</sup> )                                   | [14] |
| V <sub>2</sub> O <sub>5</sub> @PEDOT/CC<br>core/shell nanosheet arrays | 2.5 M Zn(CF <sub>3</sub> SO <sub>3</sub> ) <sub>2</sub> | 274.5 (1 A·g <sup>-1</sup> )<br>254.1 (5 A·g <sup>-1</sup> )<br>240.2 (10 A·g <sup>-1</sup> )<br>448.5 (0.5 A·g <sup>-1</sup> ) | [15] |
| VO <sub>2</sub> /PEDOT nanobelts                                       | 3 M Zn(CF <sub>3</sub> SO <sub>3</sub> ) <sub>2</sub>   | 430.4 (1 A·g <sup>-1</sup> )<br>347.2 (5 A·g <sup>-1</sup> )<br>231.2 (10 A·g <sup>-1</sup> )<br>375 (0.5 A·g <sup>-1</sup> )   | [16] |
| V <sub>2</sub> O <sub>5</sub> nanopaper                                | 2 M ZnSO <sub>4</sub>                                   | 355 (1 A·g <sup>-1</sup> )<br>290 (6 A·g <sup>-1</sup> )<br>219 (10 A·g <sup>-1</sup> )                                         | [17] |

## References

- Li, Q.; Wei, T.; Ma, K.; Yang, G.; Wang, C. Boosting the Cyclic Stability of Aqueous Zinc-Ion Battery Based on Al-Doped V10O24·12H2O Cathode Materials. *ACS Appl. Mater. Interfaces* **2019**, *11*, 20888–20894, doi:10.1021/acsami.9b05362.
- Wu, W.; Wang, S.; Zhang, C.; Hou, S.; Zhang, L. Facile and Scalable Synthesis of 3D Structures of V10O24·12H2O Nanosheets Coated with Carbon toward Ultrafast and Ultrastable Zinc Storage. *ACS Appl. Mater. Interfaces* **2021**, *13*, 18704–18712, doi:10.1021/acsami.1c00749.
- Wei, T.; Li, Q.; Yang, G.; Wang, C. High-rate and durable aqueous zinc ion battery using dendritic V10O24·12H2O cathode material with large interlamellar spacing. *Electrochim. Acta* **2018**, *287*, 60–67, doi:10.1016/j.electacta.2018.08.040.
- Liu, W.; Dong, L.; Jiang, B.; Huang, Y.; Wang, X.; Xu, C.; Kang, Z.; Mou, J.; Kang, F. Layered vanadium oxides with proton and zinc ion insertion for zinc ion batteries. *Electrochim. Acta* **2019**, *320*, doi:10.1016/j.electacta.2019.134565.
- Du, Y.; Wang, X.; Man, J.; Sun, J. A novel organic-inorganic hybrid V2O5@polyaniline as high-performance cathode for aqueous zinc-ion batteries. *Mater. Lett.* **2020**, *272*, 127813, doi:10.1016/j.matlet.2020.127813.
- Yan, H.; Ru, Q.; Gao, P.; Shi, Z.; Gao, Y.; Chen, F.; Chi-Chun Ling, F.; Wei, L. Organic pillars pre-intercalated V4+-V2O5·3H2O

- nanocomposites with enlarged interlayer and mixed valence for aqueous Zn-ion storage. *Appl. Surf. Sci.* **2020**, *534*, 147608, doi:10.1016/j.apsusc.2020.147608.
7. Chen, S.; Li, K.; Hui, K.S.; Zhang, J. Regulation of Lamellar Structure of Vanadium Oxide via Polyaniline Intercalation for High-Performance Aqueous Zinc-Ion Battery. *Adv. Funct. Mater.* **2020**, *30*, 1–11, doi:10.1002/adfm.202003890.
  8. Li, R.; Xing, F.; Li, T.; Zhang, H.; Yan, J.; Zheng, Q.; Li, X. Intercalated polyaniline in V<sub>2</sub>O<sub>5</sub> as a unique vanadium oxide bronze cathode for highly stable aqueous zinc ion battery. *Energy Storage Mater.* **2021**, *38*, 590–598, doi:10.1016/j.ensm.2021.04.004.
  9. Yin, C.; Pan, C.; Liao, X.; Pan, Y.; Yuan, L. Regulating the Interlayer Spacing of Vanadium Oxide by In Situ Polyaniline Intercalation Enables an Improved Aqueous Zinc-Ion Storage Performance. *ACS Appl. Mater. Interfaces* **2021**, *13*, 39347–39354, doi:10.1021/acsami.1c09722.
  10. Wang, Z.; Tang, X.; Yuan, S.; Bai, M.; Wang, H.; Liu, S.; Zhang, M.; Ma, Y. Engineering Vanadium Pentoxide Cathode for the Zero-Strain Cation Storage via a Scalable Intercalation-Polymerization Approach. *Adv. Funct. Mater.* **2021**, *31*, 2100164, doi:10.1002/adfm.202100164.
  11. Feng, Z.; Sun, J.; Liu, Y.; Jiang, H.; Hu, T.; Cui, M.; Tian, F.; Meng, C.; Zhang, Y. Polypyrrole-intercalation tuning lamellar structure of V<sub>2</sub>O<sub>5</sub>·nH<sub>2</sub>O boosts fast zinc-ion kinetics for aqueous zinc-ion battery. *J. Power Sources* **2022**, *536*, 231489, doi:10.1016/j.jpowsour.2022.231489.
  12. Dong, R.; Zhang, T.; Liu, J.; Li, H.; Hu, D.; Liu, X.; Xu, Q. Mechanistic Insight into Polypyrrole Coating on V<sub>2</sub>O<sub>5</sub> Cathode for Aqueous Zinc-Ion Battery. *ChemElectroChem* **2022**, *9*, doi:10.1002/celc.202101441.
  13. Yao, Z.; Wu, Q.; Chen, K.; Liu, J.; Li, C. Shallow-layer pillaring of a conductive polymer in monolithic grains to drive superior zinc storage: Via a cascading effect. *Energy Environ. Sci.* **2020**, *13*, 3149–3163, doi:10.1039/d0ee01531h.
  14. Li, S.; Wei, X.; Wu, C.; Zhang, B.; Wu, S.; Lin, Z. Constructing Three-Dimensional Structured V<sub>2</sub>O<sub>5</sub>/Conductive Polymer Composite with Fast Ion/Electron Transfer Kinetics for Aqueous Zinc-Ion Battery. *ACS Appl. Energy Mater.* **2021**, *4*, 4208–4216, doi:10.1021/acsam.1c00573.
  15. Xu, D.; Wang, H.; Li, F.; Guan, Z.; Wang, R.; He, B.; Gong, Y.; Hu, X. Conformal Conducting Polymer Shells on V<sub>2</sub>O<sub>5</sub> Nanosheet Arrays as a High-Rate and Stable Zinc-Ion Battery Cathode. *Adv. Mater. Interfaces* **2019**, *6*, 1–8, doi:10.1002/admi.201801506.
  16. Liu, X.; Xu, G.; Zhang, Q.; Huang, S.; Li, L.; Wei, X.; Cao, J.; Yang, L.; Chu, P.K. Ultrathin hybrid nanobelts of single-crystalline VO<sub>2</sub> and Poly(3,4-ethylenedioxythiophene) as cathode materials for aqueous zinc ion batteries with large capacity and high-rate capability. *J. Power Sources* **2020**, *463*, doi:10.1016/j.jpowsour.2020.228223.
  17. Li, Y.; Huang, Z.; Kalambate, P.K.; Zhong, Y.; Huang, Z.; Xie, M.; Shen, Y.; Huang, Y. V<sub>2</sub>O<sub>5</sub> nanopaper as a cathode material with high capacity and long cycle life for rechargeable aqueous zinc-ion battery. *Nano Energy* **2019**, *60*, 752–759, doi:10.1016/j.nanoen.2019.04.009.
